# Supplementary material for: Behaviors and Trends toward Routine Maintenance and Major Repairs of Afridev Handpumps in Rural Malawi
Source: MDPI journal article supplement (doi:10.3390/w13121666), 2021-06-15
Supplement: s1 [file s1]

## Supplementary Materials

**Table S1.** Scenario A - Costs of major repairs distribution.

| Without Rehabilitation |             |                    |                     |                     |                     |                     |              |       |
|------------------------|-------------|--------------------|---------------------|---------------------|---------------------|---------------------|--------------|-------|
| Year                   | <50,000 MWK | 50,000–100,000 MWK | 100,000–150,000 MWK | 150,000–200,000 MWK | 200,000–300,000 MWK | 300,000–400,000 MWK | >400,000 MWK | Total |
| 1                      | 31          | 1                  | 0                   | 1                   | 1                   | 0                   | 2            | 36    |
| 2                      | 38          | 9                  | 5                   | 2                   | 0                   | 0                   | 1            | 55    |
| 3                      | 23          | 10                 | 2                   | 0                   | 2                   | 0                   | 1            | 38    |
| 4                      | 32          | 13                 | 3                   | 0                   | 0                   | 0                   | 0            | 48    |
| 5                      | 41          | 21                 | 3                   | 1                   | 0                   | 0                   | 0            | 66    |
| 6                      | 23          | 11                 | 4                   | 0                   | 0                   | 0                   | 0            | 38    |
| 7                      | 23          | 13                 | 3                   | 0                   | 2                   | 0                   | 0            | 41    |
| 8                      | 15          | 12                 | 2                   | 2                   | 1                   | 0                   | 0            | 32    |
| 9                      | 26          | 21                 | 3                   | 3                   | 0                   | 0                   | 2            | 55    |
| 10                     | 23          | 15                 | 1                   | 3                   | 2                   | 0                   | 0            | 44    |
| 11                     | 33          | 15                 | 2                   | 2                   | 1                   | 2                   | 0            | 55    |
| 12                     | 19          | 10                 | 3                   | 4                   | 2                   | 2                   | 1            | 41    |
| 13                     | 9           | 12                 | 4                   | 2                   | 2                   | 2                   | 1            | 32    |
| 14                     | 18          | 30                 | 6                   | 1                   | 1                   | 0                   | 1            | 57    |
| 15                     | 18          | 23                 | 5                   | 2                   | 0                   | 1                   | 0            | 49    |
| Total                  | 372         | 216                | 46                  | 23                  | 14                  | 7                   | 9            | 687   |
| With Rehabilitation    |             |                    |                     |                     |                     |                     |              |       |
| Year                   | <50,000 MWK | 50,000–100,000 MWK | 100,000–150,000 MWK | 150,000–200,000 MWK | 200,000–300,000 MWK | 300,000–400,000 MWK | >400,000 MWK | Total |
| 1                      | 9           | 5                  | 5                   | 3                   | 4                   | 8                   | 7            | 41    |
| 2                      | 11          | 12                 | 2                   | 4                   | 3                   | 5                   | 14           | 51    |
| 3                      | 6           | 7                  | 2                   | 4                   | 1                   | 2                   | 5            | 27    |
| 4                      | 6           | 3                  | 1                   | 1                   | 0                   | 5                   | 14           | 30    |
| 5                      | 2           | 4                  | 0                   | 0                   | 2                   | 1                   | 16           | 25    |
| 6                      | 6           | 6                  | 0                   | 0                   | 0                   | 0                   | 6            | 18    |
| 7                      | 0           | 0                  | 0                   | 0                   | 0                   | 0                   | 2            | 2     |
| 8                      | 1           | 0                  | 1                   | 0                   | 0                   | 0                   | 0            | 2     |
| 9                      | 2           | 1                  | 0                   | 0                   | 0                   | 0                   | 0            | 3     |
| 10                     | 3           | 0                  | 0                   | 0                   | 0                   | 0                   | 1            | 4     |
| 11                     | 0           | 2                  | 0                   | 0                   | 0                   | 0                   | 0            | 2     |
| 12                     | 0           | 1                  | 0                   | 0                   | 0                   | 0                   | 1            | 2     |
| 13                     | 0           | 0                  | 1                   | 0                   | 1                   | 0                   | 0            | 2     |
| 14                     | 0           | 1                  | 0                   | 1                   | 0                   | 0                   | 1            | 3     |
| 15                     | 0           | 0                  | 0                   | 0                   | 0                   | 0                   | 0            | 0     |
| Total                  | 46          | 42                 | 12                  | 13                  | 11                  | 21                  | 67           | 212   |

**Table S2.** Scenario B - Costs of major repairs distribution.

| Without Rehabilitation |             |                    |                     |                     |                     |                     |              |       |
|------------------------|-------------|--------------------|---------------------|---------------------|---------------------|---------------------|--------------|-------|
| Year                   | <50,000 MWK | 50,000–100,000 MWK | 100,000–150,000 MWK | 150,000–200,000 MWK | 200,000–300,000 MWK | 300,000–400,000 MWK | >400,000 MWK | Total |
| 1                      | 14          | 0                  | 0                   | 0                   | 0                   | 0                   | 0            | 14    |
| 2                      | 41          | 1                  | 1                   | 0                   | 0                   | 0                   | 2            | 45    |
| 3                      | 27          | 5                  | 0                   | 0                   | 0                   | 0                   | 1            | 33    |
| 4                      | 21          | 3                  | 1                   | 0                   | 1                   | 0                   | 2            | 28    |
| 5                      | 16          | 4                  | 1                   | 0                   | 1                   | 0                   | 1            | 23    |
| 6                      | 27          | 11                 | 3                   | 1                   | 0                   | 0                   | 0            | 42    |
| 7                      | 12          | 8                  | 2                   | 1                   | 0                   | 0                   | 0            | 23    |
| 8                      | 10          | 8                  | 1                   | 0                   | 1                   | 1                   | 0            | 21    |
| 9                      | 19          | 12                 | 0                   | 1                   | 0                   | 0                   | 0            | 32    |
| 10                     | 6           | 8                  | 1                   | 1                   | 1                   | 0                   | 0            | 17    |
| 11                     | 5           | 10                 | 2                   | 1                   | 0                   | 1                   | 1            | 20    |
| 12                     | 17          | 11                 | 2                   | 2                   | 0                   | 0                   | 0            | 32    |
| 13                     | 18          | 9                  | 5                   | 4                   | 0                   | 0                   | 0            | 36    |
| 14                     | 18          | 7                  | 1                   | 0                   | 0                   | 0                   | 0            | 26    |
| 15                     | 23          | 9                  | 2                   | 1                   | 1                   | 0                   | 0            | 36    |
| Total                  | 274         | 106                | 22                  | 12                  | 5                   | 2                   | 7            | 428   |
| With Rehabilitation    |             |                    |                     |                     |                     |                     |              |       |
| Year                   | <50,000 MWK | 50,000–100,000 MWK | 100,000–150,000 MWK | 150,000–200,000 MWK | 200,000–300,000 MWK | 300,000–400,000 MWK | >400,000 MWK | Total |
| 1                      | 6           | 3                  | 3                   | 1                   | 2                   | 2                   | 6            | 23    |
| 2                      | 10          | 10                 | 12                  | 5                   | 4                   | 2                   | 5            | 48    |
| 3                      | 5           | 6                  | 7                   | 2                   | 2                   | 2                   | 4            | 28    |
| 4                      | 2           | 0                  | 5                   | 2                   | 3                   | 1                   | 1            | 14    |
| 5                      | 1           | 4                  | 2                   | 1                   | 3                   | 0                   | 0            | 11    |
| 6                      | 5           | 2                  | 0                   | 0                   | 0                   | 0                   | 1            | 8     |
| 7                      | 5           | 1                  | 0                   | 0                   | 0                   | 1                   | 0            | 7     |
| 8                      | 0           | 0                  | 0                   | 0                   | 0                   | 0                   | 0            | 0     |
| 9                      | 0           | 0                  | 0                   | 0                   | 0                   | 0                   | 0            | 0     |
| 10                     | 0           | 0                  | 0                   | 0                   | 0                   | 0                   | 0            | 0     |
| 11                     | 1           | 0                  | 0                   | 1                   | 0                   | 0                   | 0            | 2     |
| 12                     | 1           | 0                  | 0                   | 1                   | 0                   | 0                   | 1            | 3     |
| 13                     | 0           | 0                  | 0                   | 0                   | 0                   | 0                   | 0            | 0     |
| 14                     | 0           | 0                  | 0                   | 0                   | 0                   | 0                   | 0            | 0     |
| 15                     | 0           | 1                  | 0                   | 0                   | 0                   | 0                   | 0            | 1     |
| Total                  | 36          | 27                 | 29                  | 13                  | 14                  | 8                   | 18           | 145   |

**Table S3.** Scenario C - Costs of major repairs distribution.

| Without Rehabilitation |             |                    |                     |                     |                     |                     |              |       |
|------------------------|-------------|--------------------|---------------------|---------------------|---------------------|---------------------|--------------|-------|
| Year                   | <50,000 MWK | 50,000–100,000 MWK | 100,000–150,000 MWK | 150,000–200,000 MWK | 200,000–300,000 MWK | 300,000–400,000 MWK | >400,000 MWK | Total |
| 1                      | 2           | 1                  | 0                   | 0                   | 0                   | 0                   | 0            | 3     |
| 2                      | 12          | 1                  | 0                   | 0                   | 0                   | 0                   | 1            | 14    |
| 3                      | 9           | 1                  | 0                   | 0                   | 0                   | 0                   | 0            | 10    |
| 4                      | 10          | 5                  | 1                   | 0                   | 0                   | 0                   | 0            | 16    |
| 5                      | 7           | 9                  | 4                   | 0                   | 0                   | 0                   | 1            | 21    |
| 6                      | 11          | 8                  | 1                   | 0                   | 0                   | 1                   | 0            | 21    |
| 7                      | 4           | 1                  | 2                   | 0                   | 0                   | 0                   | 0            | 7     |
| 8                      | 4           | 6                  | 0                   | 0                   | 0                   | 0                   | 0            | 10    |
| 9                      | 7           | 6                  | 1                   | 0                   | 0                   | 0                   | 0            | 14    |
| 10                     | 7           | 8                  | 1                   | 0                   | 0                   | 0                   | 0            | 16    |
| 11                     | 11          | 6                  | 0                   | 0                   | 0                   | 0                   | 0            | 17    |
| 12                     | 10          | 9                  | 1                   | 1                   | 0                   | 0                   | 1            | 22    |
| 13                     | 7           | 12                 | 4                   | 1                   | 0                   | 0                   | 0            | 24    |
| 14                     | 7           | 9                  | 2                   | 0                   | 0                   | 0                   | 0            | 18    |
| 15                     | 7           | 5                  | 2                   | 0                   | 0                   | 0                   | 0            | 14    |
| Total                  | 115         | 87                 | 19                  | 2                   | 0                   | 1                   | 3            | 227   |
| With Rehabilitation    |             |                    |                     |                     |                     |                     |              |       |
| Year                   | <50,000 MWK | 50,000–100,000 MWK | 100,000–150,000 MWK | 150,000–200,000 MWK | 200,000–300,000 MWK | 300,000–400,000 MWK | >400,000 MWK | Total |
| 1                      | 4           | 2                  | 0                   | 0                   | 0                   | 4                   | 2            | 12    |
| 2                      | 4           | 5                  | 3                   | 0                   | 0                   | 0                   | 3            | 15    |
| 3                      | 1           | 4                  | 1                   | 1                   | 1                   | 0                   | 12           | 20    |
| 4                      | 0           | 2                  | 1                   | 0                   | 1                   | 1                   | 0            | 5     |
| 5                      | 1           | 1                  | 1                   | 0                   | 0                   | 0                   | 0            | 3     |
| 6                      | 1           | 1                  | 0                   | 0                   | 0                   | 0                   | 0            | 2     |
| 7                      | 1           | 0                  | 0                   | 0                   | 0                   | 0                   | 0            | 1     |
| 8                      | 1           | 0                  | 0                   | 0                   | 0                   | 0                   | 0            | 1     |
| 9                      | 0           | 0                  | 0                   | 1                   | 0                   | 0                   | 3            | 4     |
| 10                     | 0           | 0                  | 0                   | 0                   | 0                   | 1                   | 0            | 1     |
| 11                     | 0           | 0                  | 0                   | 0                   | 0                   | 0                   | 0            | 0     |
| 12                     | 0           | 0                  | 0                   | 0                   | 0                   | 0                   | 1            | 1     |
| 13                     | 0           | 0                  | 0                   | 0                   | 0                   | 0                   | 0            | 0     |
| 14                     | 0           | 0                  | 0                   | 0                   | 0                   | 1                   | 0            | 1     |
| 15                     | 0           | 0                  | 0                   | 0                   | 0                   | 0                   | 0            | 0     |
| Total                  | 13          | 15                 | 6                   | 2                   | 2                   | 7                   | 21           | 66    |

**Table S4.** Scenario D - Costs of major repairs distribution.

| Without Rehabilitation |             |                    |                     |                     |                     |                     |              |       |
|------------------------|-------------|--------------------|---------------------|---------------------|---------------------|---------------------|--------------|-------|
| Year                   | <50,000 MWK | 50,000–100,000 MWK | 100,000–150,000 MWK | 150,000–200,000 MWK | 200,000–300,000 MWK | 300,000–400,000 MWK | >400,000 MWK | Total |
| 1                      | 3           | 0                  | 0                   | 0                   | 0                   | 0                   | 0            | 3     |
| 2                      | 5           | 4                  | 0                   | 0                   | 0                   | 0                   | 1            | 10    |
| 3                      | 1           | 0                  | 1                   | 0                   | 1                   | 0                   | 0            | 3     |
| 4                      | 3           | 3                  | 3                   | 1                   | 0                   | 0                   | 0            | 10    |
| 5                      | 1           | 3                  | 2                   | 0                   | 0                   | 0                   | 0            | 6     |
| 6                      | 3           | 3                  | 2                   | 1                   | 0                   | 0                   | 0            | 9     |
| 7                      | 6           | 6                  | 1                   | 0                   | 0                   | 0                   | 1            | 14    |
| 8                      | 4           | 4                  | 1                   | 1                   | 1                   | 0                   | 0            | 11    |
| 9                      | 10          | 4                  | 2                   | 2                   | 1                   | 0                   | 0            | 19    |
| 10                     | 1           | 3                  | 4                   | 0                   | 0                   | 0                   | 0            | 8     |
| 11                     | 5           | 8                  | 0                   | 0                   | 0                   | 0                   | 0            | 13    |
| 12                     | 7           | 14                 | 2                   | 1                   | 1                   | 1                   | 1            | 27    |
| 13                     | 5           | 6                  | 2                   | 0                   | 0                   | 0                   | 0            | 13    |
| 14                     | 4           | 5                  | 4                   | 0                   | 0                   | 0                   | 0            | 13    |
| 15                     | 5           | 8                  | 1                   | 1                   | 0                   | 1                   | 1            | 17    |
| Total                  | 63          | 71                 | 25                  | 7                   | 4                   | 2                   | 4            | 176   |
| With Rehabilitation    |             |                    |                     |                     |                     |                     |              |       |
| Year                   | <50,000 MWK | 50,000–100,000 MWK | 100,000–150,000 MWK | 150,000–200,000 MWK | 200,000–300,000 MWK | 300,000–400,000 MWK | >400,000 MWK | Total |
| 1                      | 1           | 1                  | 4                   | 0                   | 1                   | 0                   | 3            | 10    |
| 2                      | 2           | 3                  | 4                   | 2                   | 0                   | 1                   | 4            | 16    |
| 3                      | 1           | 0                  | 0                   | 0                   | 0                   | 3                   | 1            | 5     |
| 4                      | 1           | 3                  | 0                   | 0                   | 0                   | 0                   | 1            | 5     |
| 5                      | 2           | 1                  | 1                   | 0                   | 2                   | 0                   | 1            | 7     |
| 6                      | 1           | 3                  | 1                   | 0                   | 0                   | 0                   | 0            | 5     |
| 7                      | 1           | 1                  | 0                   | 0                   | 0                   | 0                   | 0            | 2     |
| 8                      | 1           | 1                  | 0                   | 0                   | 0                   | 0                   | 0            | 2     |
| 9                      | 1           | 0                  | 0                   | 0                   | 0                   | 0                   | 0            | 1     |
| 10                     | 0           | 1                  | 0                   | 0                   | 0                   | 0                   | 0            | 1     |
| 11                     | 0           | 0                  | 0                   | 0                   | 0                   | 1                   | 0            | 1     |
| 12                     | 0           | 1                  | 0                   | 0                   | 0                   | 1                   | 0            | 2     |
| 13                     | 0           | 0                  | 0                   | 0                   | 0                   | 0                   | 0            | 0     |
| 14                     | 0           | 0                  | 0                   | 0                   | 0                   | 0                   | 0            | 0     |
| 15                     | 0           | 0                  | 0                   | 0                   | 0                   | 0                   | 0            | 0     |
| Total                  | 11          | 15                 | 10                  | 2                   | 3                   | 6                   | 10           | 57    |

**Table S5.** Distribution of component replacement for assets with no rehabilitation.

|                   | Scenario A | Scenario B | Scenario C | Scenario D | Total |
|-------------------|------------|------------|------------|------------|-------|
| Fast Wearing      | 1499       | 1207       | 578        | 341        | 3625  |
| Longer Life       | 1127       | 640        | 398        | 308        | 2473  |
| Total             | 2626       | 1847       | 976        | 649        | 6098  |
| Fast Wearing      |            |            |            |            |       |
| Bobbin            | 234        | 167        | 87         | 55         | 543   |
| Bush Bearings     | 328        | 243        | 141        | 73         | 785   |
| Centralisers      | 333        | 245        | 129        | 54         | 761   |
| Cup Seal          | 180        | 167        | 58         | 50         | 455   |
| O-Ring            | 176        | 156        | 56         | 43         | 431   |
| U-Seal            | 248        | 229        | 107        | 66         | 650   |
| Longer Life       |            |            |            |            |       |
| Cylinder          | 85         | 52         | 18         | 25         | 180   |
| Foot Valve        | 143        | 85         | 67         | 35         | 330   |
| Fulcrum Pin       | 106        | 37         | 29         | 26         | 198   |
| Handle            | 89         | 41         | 40         | 20         | 190   |
| Handle Pin        | 71         | 29         | 29         | 16         | 145   |
| Hanger Pin        | 84         | 39         | 27         | 15         | 165   |
| Pedestal          | 18         | 13         | 5          | 2          | 38    |
| Plunger           | 92         | 54         | 35         | 20         | 201   |
| Pump Head         | 41         | 31         | 11         | 14         | 97    |
| Pump Head Cover   | 25         | 19         | 4          | 11         | 59    |
| Rising Main (PVC) | 59         | 25         | 19         | 22         | 125   |
| Rods              | 232        | 123        | 90         | 77         | 522   |
| Rope              | 47         | 16         | 11         | 17         | 91    |
| Sockets           | 35         | 76         | 13         | 8          | 132   |

**Table S6.** Distribution of component replacement for assets with rehabilitation.

|                   | Scenario A | Scenario B | Scenario C | Scenario D | Total |
|-------------------|------------|------------|------------|------------|-------|
| Fast Wearing      | 564        | 427        | 223        | 126        | 1340  |
| Longer Life       | 1059       | 472        | 393        | 204        | 2128  |
| Total             | 1623       | 899        | 616        | 330        | 3468  |
| Fast Wearing      |            |            |            |            |       |
| Bobbin            | 99         | 63         | 37         | 22         | 221   |
| Bush Bearings     | 119        | 68         | 47         | 26         | 260   |
| Centralisers      | 101        | 73         | 40         | 20         | 234   |
| Cup Seal          | 93         | 73         | 41         | 14         | 221   |
| O-Ring            | 91         | 61         | 37         | 19         | 208   |
| U-Seal            | 61         | 89         | 21         | 25         | 196   |
| Longer Life       |            |            |            |            |       |
| Cylinder          | 84         | 69         | 37         | 13         | 203   |
| Foot Valve        | 89         | 74         | 40         | 17         | 220   |
| Fulcrum Pin       | 74         | 35         | 31         | 14         | 154   |
| Handle            | 83         | 20         | 29         | 13         | 145   |
| Handle Pin        | 73         | 19         | 28         | 11         | 131   |
| Hanger Pin        | 75         | 22         | 27         | 12         | 136   |
| Pedestal          | 63         | 13         | 21         | 9          | 106   |
| Plunger           | 80         | 29         | 29         | 16         | 154   |
| Pump Head         | 80         | 17         | 24         | 16         | 137   |
| Pump Head Cover   | 72         | 11         | 22         | 14         | 119   |
| Rising Main (PVC) | 74         | 7          | 24         | 12         | 117   |
| Rods              | 124        | 96         | 47         | 35         | 302   |
| Rope              | 66         | 17         | 25         | 12         | 120   |
| Sockets           | 22         | 43         | 9          | 10         | 84    |

**Table S7.** Scenario A rod replacements.

| Without Rehabilitation |      |      |      |      |      |      |      |      |      |      |      |      |      |      |      |
|------------------------|------|------|------|------|------|------|------|------|------|------|------|------|------|------|------|
| No. of rods            | Year |      |      |      |      |      |      |      |      |      |      |      |      |      |      |
|                        | 1    | 2    | 3    | 4    | 5    | 6    | 7    | 8    | 9    | 10   | 11   | 12   | 13   | 14   | 15   |
| 1-2                    | 2    | 2    | 4    | 5    | 18   | 6    | 1    | 4    | 5    | 6    | 9    | 4    | 4    | 12   | 9    |
| 3-4                    | 1    | 4    | 4    | 5    | 3    | 2    | 4    | 4    | 4    | 1    | 3    | 1    | 4    | 7    | 4    |
| 5-6                    | 1    | 2    | 0    | 2    | 3    | 2    | 3    | 2    | 1    | 0    | 3    | 4    | 3    | 5    | 3    |
| 7-8                    | 0    | 1    | 1    | 2    | 3    | 2    | 0    | 0    | 2    | 2    | 1    | 1    | 0    | 0    | 0    |
| 9-10                   | 1    | 0    | 0    | 0    | 3    | 2    | 1    | 0    | 1    | 1    | 1    | 2    | 5    | 2    | 1    |
| >10                    | 1    | 0    | 2    | 2    | 1    | 0    | 1    | 1    | 0    | 0    | 0    | 3    | 2    | 0    | 0    |
| Total, n               | 6    | 9    | 11   | 16   | 31   | 14   | 10   | 11   | 13   | 10   | 17   | 15   | 18   | 26   | 17   |
| Total, %               | 1.74 | 2.62 | 3.20 | 4.65 | 9.01 | 4.07 | 2.91 | 3.20 | 3.78 | 2.91 | 4.94 | 4.36 | 5.23 | 7.56 | 4.94 |

  

| With Rehabilitation |      |      |      |      |      |      |      |      |      |      |      |      |      |      |      |
|---------------------|------|------|------|------|------|------|------|------|------|------|------|------|------|------|------|
| No. of rods         | Year |      |      |      |      |      |      |      |      |      |      |      |      |      |      |
|                     | 1    | 2    | 3    | 4    | 5    | 6    | 7    | 8    | 9    | 10   | 11   | 12   | 13   | 14   | 15   |
| 1-2                 | 3    | 6    | 3    | 1    | 0    | 2    | 0    | 0    | 0    | 0    | 0    | 0    | 0    | 0    | 0    |
| 3-4                 | 1    | 4    | 5    | 0    | 1    | 2    | 1    | 0    | 0    | 0    | 0    | 0    | 0    | 1    | 0    |
| 5-6                 | 5    | 5    | 2    | 4    | 5    | 0    | 1    | 0    | 0    | 0    | 0    | 0    | 1    | 0    | 0    |
| 7-8                 | 4    | 5    | 5    | 5    | 7    | 1    | 0    | 0    | 0    | 1    | 0    | 1    | 0    | 1    | 0    |
| 9-10                | 2    | 5    | 2    | 3    | 3    | 3    | 1    | 0    | 0    | 0    | 0    | 0    | 0    | 0    | 0    |
| >10                 | 0    | 3    | 3    | 5    | 2    | 2    | 0    | 1    | 1    | 0    | 0    | 1    | 0    | 0    | 0    |
| Total, n            | 15   | 28   | 20   | 18   | 18   | 10   | 3    | 1    | 1    | 1    | 0    | 2    | 1    | 2    | 0    |
| Total, %            | 4.36 | 8.14 | 5.81 | 5.23 | 5.23 | 2.91 | 0.87 | 0.29 | 0.29 | 0.29 | 0.00 | 0.58 | 0.29 | 0.58 | 0.00 |

Table S8. Scenario B rod replacements.

| Without Rehabilitation |      |      |      |      |      |      |      |      |      |      |      |      |      |      |      |
|------------------------|------|------|------|------|------|------|------|------|------|------|------|------|------|------|------|
| No. of rods            | Year |      |      |      |      |      |      |      |      |      |      |      |      |      |      |
|                        | 1    | 2    | 3    | 4    | 5    | 6    | 7    | 8    | 9    | 10   | 11   | 12   | 13   | 14   | 15   |
| 1-2                    | 0    | 2    | 1    | 2    | 2    | 4    | 4    | 2    | 4    | 4    | 3    | 3    | 9    | 2    | 4    |
| 3-4                    | 0    | 0    | 1    | 1    | 0    | 2    | 1    | 2    | 1    | 2    | 1    | 4    | 5    | 3    | 5    |
| 5-6                    | 0    | 2    | 1    | 2    | 2    | 1    | 2    | 1    | 2    | 2    | 0    | 0    | 2    | 3    | 1    |
| 7-8                    | 0    | 0    | 1    | 1    | 1    | 2    | 0    | 1    | 1    | 0    | 2    | 3    | 3    | 1    | 0    |
| 9-10                   | 0    | 0    | 0    | 1    | 0    | 1    | 1    | 1    | 1    | 0    | 0    | 2    | 1    | 0    | 0    |
| >10                    | 0    | 0    | 0    | 0    | 0    | 0    | 0    | 2    | 0    | 0    | 0    | 0    | 1    | 0    | 0    |
| Total, n               | 0    | 4    | 4    | 7    | 5    | 10   | 8    | 9    | 9    | 8    | 6    | 12   | 21   | 9    | 10   |
| Total, %               | 0.00 | 1.83 | 1.83 | 3.21 | 2.29 | 4.59 | 3.67 | 4.13 | 4.13 | 3.67 | 2.75 | 5.50 | 9.63 | 4.13 | 4.59 |

  

| With Rehabilitation |      |       |      |      |      |      |      |      |      |      |      |      |      |      |      |
|---------------------|------|-------|------|------|------|------|------|------|------|------|------|------|------|------|------|
| No. of rods         | Year |       |      |      |      |      |      |      |      |      |      |      |      |      |      |
|                     | 1    | 2     | 3    | 4    | 5    | 6    | 7    | 8    | 9    | 10   | 11   | 12   | 13   | 14   | 15   |
| 1-2                 | 2    | 0     | 3    | 1    | 0    | 1    | 0    | 0    | 0    | 0    | 0    | 0    | 0    | 0    | 0    |
| 3-4                 | 2    | 10    | 3    | 2    | 1    | 1    | 1    | 0    | 0    | 0    | 0    | 0    | 0    | 0    | 0    |
| 5-6                 | 2    | 8     | 4    | 4    | 4    | 0    | 0    | 0    | 0    | 0    | 0    | 0    | 0    | 0    | 0    |
| 7-8                 | 1    | 8     | 7    | 4    | 1    | 1    | 0    | 0    | 0    | 0    | 0    | 0    | 0    | 0    | 0    |
| 9-10                | 3    | 10    | 2    | 1    | 1    | 1    | 0    | 0    | 0    | 0    | 0    | 2    | 0    | 0    | 0    |
| >10                 | 2    | 1     | 0    | 1    | 1    | 0    | 0    | 0    | 0    | 0    | 0    | 0    | 0    | 0    | 0    |
| Total, n            | 12   | 37    | 19   | 13   | 8    | 4    | 1    | 0    | 0    | 0    | 0    | 2    | 0    | 0    | 0    |
| Total, %            | 5.50 | 16.97 | 8.72 | 5.96 | 3.67 | 1.83 | 0.46 | 0.00 | 0.00 | 0.00 | 0.00 | 0.92 | 0.00 | 0.00 | 0.00 |



Table S9. Scenario C rod replacements.

| Without Rehabilitation |      |      |       |      |      |      |      |      |      |      |      |      |       |      |      |
|------------------------|------|------|-------|------|------|------|------|------|------|------|------|------|-------|------|------|
| No. of rods            | Year |      |       |      |      |      |      |      |      |      |      |      |       |      |      |
|                        | 1    | 2    | 3     | 4    | 5    | 6    | 7    | 8    | 9    | 10   | 11   | 12   | 13    | 14   | 15   |
| 1-2                    | 1    | 2    | 0     | 2    | 6    | 4    | 2    | 0    | 2    | 3    | 4    | 6    | 6     | 3    | 5    |
| 3-4                    | 0    | 0    | 0     | 0    | 2    | 1    | 1    | 2    | 2    | 2    | 0    | 2    | 5     | 2    | 0    |
| 5-6                    | 0    | 0    | 1     | 0    | 0    | 1    | 0    | 1    | 0    | 1    | 0    | 2    | 1     | 1    | 1    |
| 7-8                    | 0    | 0    | 0     | 0    | 0    | 1    | 0    | 2    | 0    | 0    | 0    | 1    | 3     | 0    | 0    |
| 9-10                   | 0    | 0    | 0     | 1    | 0    | 0    | 0    | 0    | 0    | 1    | 0    | 1    | 0     | 1    | 0    |
| >10                    | 0    | 0    | 0     | 0    | 0    | 1    | 0    | 0    | 0    | 0    | 0    | 1    | 2     | 0    | 0    |
| Total, n               | 1    | 2    | 1     | 3    | 8    | 8    | 3    | 5    | 4    | 7    | 4    | 13   | 17    | 7    | 6    |
| Total, %               | 0.74 | 1.48 | 0.74  | 2.22 | 5.93 | 5.93 | 2.22 | 3.70 | 2.96 | 5.19 | 2.96 | 9.63 | 12.59 | 5.19 | 4.44 |
| With Rehabilitation    |      |      |       |      |      |      |      |      |      |      |      |      |       |      |      |
| No. of rods            | Year |      |       |      |      |      |      |      |      |      |      |      |       |      |      |
|                        | 1    | 2    | 3     | 4    | 5    | 6    | 7    | 8    | 9    | 10   | 11   | 12   | 13    | 14   | 15   |
| 1-2                    | 3    | 2    | 1     | 0    | 0    | 0    | 0    | 1    | 0    | 0    | 0    | 0    | 0     | 0    | 0    |
| 3-4                    | 0    | 1    | 1     | 0    | 0    | 0    | 1    | 0    | 0    | 0    | 0    | 0    | 0     | 0    | 0    |
| 5-6                    | 0    | 4    | 4     | 0    | 1    | 0    | 0    | 0    | 1    | 0    | 0    | 0    | 0     | 0    | 0    |
| 7-8                    | 1    | 1    | 1     | 0    | 0    | 0    | 0    | 0    | 0    | 0    | 0    | 0    | 0     | 0    | 0    |
| 9-10                   | 2    | 2    | 8     | 0    | 0    | 0    | 0    | 0    | 2    | 1    | 0    | 1    | 0     | 0    | 0    |
| >10                    | 1    | 1    | 3     | 0    | 0    | 1    | 0    | 0    | 0    | 0    | 0    | 0    | 0     | 1    | 0    |
| Total, n               | 7    | 11   | 18    | 0    | 1    | 1    | 1    | 1    | 3    | 1    | 0    | 1    | 0     | 1    | 0    |
| Total, %               | 5.19 | 8.15 | 13.33 | 0.00 | 0.74 | 0.74 | 0.74 | 0.74 | 2.22 | 0.74 | 0.00 | 0.74 | 0.00  | 0.74 | 0.00 |

**Table S10.** Scenario D rod replacements.

| Without Rehabilitation |      |      |      |      |      |      |      |      |      |      |      |       |      |      |      |
|------------------------|------|------|------|------|------|------|------|------|------|------|------|-------|------|------|------|
| No. of rods            | Year |      |      |      |      |      |      |      |      |      |      |       |      |      |      |
|                        | 1    | 2    | 3    | 4    | 5    | 6    | 7    | 8    | 9    | 10   | 11   | 12    | 13   | 14   | 15   |
| 1-2                    | 1    | 2    | 0    | 2    | 1    | 1    | 1    | 4    | 4    | 1    | 2    | 10    | 2    | 2    | 3    |
| 3-4                    | 0    | 3    | 0    | 0    | 0    | 1    | 1    | 0    | 1    | 1    | 2    | 1     | 4    | 1    | 2    |
| 5-6                    | 0    | 0    | 1    | 1    | 0    | 1    | 1    | 1    | 1    | 1    | 0    | 2     | 0    | 0    | 1    |
| 7-8                    | 0    | 1    | 1    | 1    | 1    | 0    | 0    | 1    | 1    | 0    | 0    | 0     | 0    | 1    | 0    |
| 9-10                   | 0    | 0    | 0    | 1    | 0    | 0    | 0    | 0    | 2    | 1    | 0    | 0     | 0    | 1    | 2    |
| >10                    | 0    | 0    | 0    | 0    | 0    | 0    | 0    | 0    | 0    | 0    | 0    | 0     | 0    | 0    | 0    |
| Total, n               | 1    | 6    | 2    | 5    | 2    | 3    | 3    | 6    | 9    | 4    | 4    | 13    | 6    | 5    | 8    |
| Total, %               | 0.89 | 5.36 | 1.79 | 4.46 | 1.79 | 2.68 | 2.68 | 5.36 | 8.04 | 3.57 | 3.57 | 11.61 | 5.36 | 4.46 | 7.14 |

  

| With Rehabilitation |      |       |      |      |      |      |      |      |      |      |      |      |      |      |      |
|---------------------|------|-------|------|------|------|------|------|------|------|------|------|------|------|------|------|
| No. of rods         | Year |       |      |      |      |      |      |      |      |      |      |      |      |      |      |
|                     | 1    | 2     | 3    | 4    | 5    | 6    | 7    | 8    | 9    | 10   | 11   | 12   | 13   | 14   | 15   |
| 1-2                 | 0    | 2     | 0    | 1    | 1    | 2    | 1    | 0    | 1    | 1    | 0    | 0    | 0    | 0    | 0    |
| 3-4                 | 0    | 3     | 0    | 0    | 0    | 1    | 0    | 1    | 0    | 0    | 0    | 0    | 0    | 0    | 0    |
| 5-6                 | 0    | 0     | 1    | 0    | 1    | 0    | 0    | 0    | 0    | 0    | 1    | 0    | 0    | 0    | 0    |
| 7-8                 | 0    | 2     | 0    | 0    | 0    | 1    | 0    | 1    | 0    | 0    | 0    | 1    | 0    | 0    | 0    |
| 9-10                | 1    | 3     | 1    | 2    | 0    | 0    | 0    | 0    | 0    | 0    | 0    | 0    | 0    | 0    | 0    |
| >10                 | 0    | 2     | 0    | 1    | 1    | 1    | 0    | 0    | 0    | 0    | 0    | 1    | 0    | 0    | 0    |
| Total, n            | 1    | 12    | 2    | 4    | 3    | 5    | 1    | 2    | 1    | 1    | 1    | 2    | 0    | 0    | 0    |
| Total, %            | 0.89 | 10.71 | 1.79 | 3.57 | 2.68 | 4.46 | 0.89 | 1.79 | 0.89 | 0.89 | 0.89 | 1.79 | 0.00 | 0.00 | 0.00 |
